# Supplementary material for: Chemosymbiotic species from the Gulf of Cadiz (NE Atlantic): distribution, life styles and nutritional patterns
Source: Copernicus journal article supplement (doi:10.5194/bg-10-2569-2013), 2013-04-17
Supplement: Supplementary file 1 [file bg-10-2569-2013-supplement.pdf]

## Supplementary material

Table S1. Biogeochemistry data available in the literature for the study sites

| Location           | SMTZ<br>(cm)       | GH | $\delta^{13}\text{C}_M$<br>(‰) | $\delta^{13}\text{C}_G$<br>(‰) | [CH <sub>4</sub> ]<br>(mM) | Diffusive fluxes (mmol.m <sup>-2</sup> .yr <sup>-1</sup> ) |                               |                          |
|--------------------|--------------------|----|--------------------------------|--------------------------------|----------------------------|------------------------------------------------------------|-------------------------------|--------------------------|
|                    |                    |    |                                |                                |                            | CH <sub>4</sub>                                            | SO <sub>4</sub> <sup>2-</sup> | sulfide                  |
| Mercator MV        | +80 <sup>a</sup>   | -  | -33.8 to -38.8 <sup>b</sup>    |                                |                            |                                                            |                               |                          |
| Gemini MV          | +90 <sup>a</sup>   |    |                                |                                | 0-62 <sup>d</sup>          |                                                            |                               |                          |
| Meknès MV          |                    | -  | -48.9 to -52.8 <sup>b</sup>    |                                |                            |                                                            |                               |                          |
| Ginsburg MV        |                    |    | -35 to -56 <sup>f</sup>        |                                | 0-130 <sup>d</sup>         | 2223 <sup>e</sup>                                          |                               |                          |
| Jesus Baraza MV    |                    |    | -24 to -32 <sup>f</sup>        |                                |                            |                                                            |                               |                          |
| Capt. Arutyunov MV | 25-40 <sup>c</sup> | +  | -46 to -52 <sup>b</sup>        | -52.0 to -50.5 <sup>b</sup>    | 0-85 <sup>d</sup>          | 40700 <sup>c</sup>                                         | 70800 <sup>c</sup>            | 70200 <sup>c</sup>       |
|                    |                    |    | -48.3 to -48.4 <sup>d</sup>    |                                |                            | 6268.7 <sup>e</sup>                                        |                               |                          |
| Carlos Ribeiro MV  | 20-55 <sup>e</sup> | +  | -23 to -66 <sup>f</sup>        |                                | 75-120 <sup>e</sup>        | 445-3614 <sup>e</sup>                                      |                               |                          |
|                    |                    |    | -51.9 to -69 <sup>b</sup>      |                                |                            |                                                            |                               |                          |
| Bonjardim MV       | 45-70 <sup>c</sup> | +  | -50 to -64 <sup>f</sup>        | -52.7 <sup>b</sup>             | 0-62 <sup>e</sup>          | 7600 <sup>c</sup>                                          | 38800;86700 <sup>c</sup>      | 29900;79500 <sup>c</sup> |
|                    |                    |    | -49.4 to -52.7 <sup>b</sup>    |                                |                            | 459.42 <sup>e</sup>                                        |                               |                          |
|                    |                    |    | -49.6 <sup>d</sup>             |                                |                            |                                                            |                               |                          |
| Porto MV           |                    | +  | -51.7 to -55.6 <sup>b</sup>    | -54.9 <sup>b</sup>             |                            |                                                            |                               |                          |

a) Van Rensbergen et al., 2005; b) Nuzzo et al., 2009; c) Niemman et al., 2006; d) Hensen et al. 2007; e) Vanneste et al., 2011 f) Stadnitskaia et al., 2006

Table S2. Isotope signature of several chemosynthetic species found at cold seeps (CS) and reduced sediments (RS). EP: Eastern Pacific; IP: Indo-Pacific Ocean; NEA: North East Atlantic; NP: North Pacific; NWP: North Western Pacific; SEP: South Eastern Pacific; WA: Western Atlantic; WP: Western Pacific. References: 1- this study; 2 - Sahling et al., 2003; 3 - Levin and Michener, 2002; 4 - Vetter and Fry, 1998; 5 - Conway et al., 1989; 6 - Thurber et al., 201; 7 - Dando et al., 1986; 8 - Duperron et al., 2007; 9 - Compton et al., 2004; 10 - Olu Le Roy et al., 2004; 11 - Carlier et al., 2010 ; 12 Decker and Olu, 2010 ; 13 - Sellanes et al., 2008; 14 - Spiro et al., 1986; 15 - Cary et al., 1989 ; 16 - Cavanaugh et al., 1992; 17 - Olu et al., 2009; 18 - MacAvoy et al., 2008; 19 - Schmaljohann et al., 1990; 20 - Gebruk et al., 2003.

|                              | $\delta^{13}\text{C}$ | $\delta^{15}\text{N}$ | $\delta^{34}\text{S}$ | Location | Site                  | Depth (m)  | Ref.      |
|------------------------------|-----------------------|-----------------------|-----------------------|----------|-----------------------|------------|-----------|
| <b>BIVALVIA</b>              |                       |                       |                       |          |                       |            |           |
| <b>Solemyidae</b>            |                       |                       |                       |          |                       |            |           |
| <i>Acharax gadirae</i>       | -34.7 to -27.2        | -3.4 to 2.7           | -25.7 to 11.9         | NEA      | Gulf of Cadiz         | 556-3902   | CS 1      |
| <i>Acharax</i> sp.           | -36.1 to -34.7        | 0.1 to 1.0            |                       | WP       | Sea of Okhotsk        | 382        | CS 2      |
| <i>Acharax</i> sp.           | -33.5                 | 0.6 to 6.6            |                       | NP       | Gulf of Alaska        | 4413-4447  | CS 3      |
| <i>Solemya elarraichenis</i> | -34.0 to -32.1        | 2.0 to 6.1            | -16.5 to 2.2          | NEA      | Gulf of Cadiz         | 358-1115   | CS 1      |
| <i>Solemya reidi</i>         |                       |                       | -30.4                 | EP       | Sewage outfall        | 90         | RS 4      |
| <i>Solemya velum</i>         | -33.9 to -31.5        | -9.8 to -7.7          | -31 to -28.2          | WA       | Salt Marsh            | ?          | RS 5      |
| Solemyidae und               | -32.3 to -30.7        | -0.7 to 4.4           |                       | WP       | NZ methane seeps      | 1040-1056  | CS 6      |
| <b>Lucinidae</b>             |                       |                       |                       |          |                       |            |           |
| <i>Lucinoma asapeus</i>      | -29.8                 | 4.4                   | 4.3                   | NEA      | Gulf of Cadiz         | 358        | CS 1      |
| <i>Lucinoma borealis</i>     | -29.0 to -24.1        |                       |                       | NEA      |                       | 0.5        | RS 7      |
| <i>Lucinoma kazani</i>       | -30.5 to -28.2        |                       |                       | NEA      | Eastern Mediterranean | 507-1691   | CS 8      |
| <i>Divaricella irpex</i>     | -23.1                 | -0.9                  |                       | IP       | Roebuck Bay           | 3.5 – 8.5  | RS 9      |
| <i>Myrtea amorpha</i>        | -30.1 to -27.7        | -1.0 to 1.4           |                       | NEA      | Eastern Mediterranean | 1950- 2025 | CS 10; 11 |
| <i>Pseudomiltha</i> sp.      |                       |                       | -10.6                 | WA       | Lousiana slope        | 400-700 m  | CS 4      |
| <b>Thyasiridae</b>           |                       |                       |                       |          |                       |            |           |
| <i>Thyasira vulcolutre</i>   | -35.9 to -34.4        | 2.1 to 5.6            | -27.6 to 1.3          | NEA      | Gulf of Cadiz         |            | CS 1      |
| <i>Conchocele bisecta</i>    | -33.1                 | 4.2                   |                       | NWP      | Sea of Okhotsk        | 700        | CS 2      |
| <i>Thyasira</i> und          |                       |                       |                       |          | Haakon Mosby MV       |            | CS 12     |
| <i>Thyasira methanophila</i> | -35.4                 | 10.2                  |                       | SEP      | CMSA                  | 710-926    | CS 13     |
| <i>Thyasira sarsi</i>        | -39.5 to -28.2        |                       |                       | NEA      | Norwegian fjord       | 60         | 14        |

|                                        |                |               |               |     |                          |           |    |    |
|----------------------------------------|----------------|---------------|---------------|-----|--------------------------|-----------|----|----|
| <i>Thyasira striata</i>                | -28.9          | -5.2          | -6.0          | NEA | Eastern Mediterranean    | 2025      | CS | 11 |
| <b>Mytilidae</b>                       |                |               |               |     |                          |           |    |    |
| <i>"Bathymodiolus " mauritanicus</i>   | -52.4 to -48.9 | -1.0 to 0.9   | 16.8 to 18.3  | NEA | Gulf of Cadiz            |           | CS | 1  |
| <i>Bathymodiolus</i> sp.               |                |               | 10.5          | WA  | Lousiana slope           |           | CS | 3  |
| <i>Bathymodiolus</i> sp.               |                |               | 8.2           |     | Brine seeps              |           | CS | 15 |
| <i>Bathymodiolus</i> sp.               | -35.6 to -32.7 | -10.5 to -4.2 |               | NA  | Mid Atlantic Ridge       |           | HV | 16 |
| <i>Bathymodiolus boomerang</i>         | -67.0 to -62.4 | -3.1 to 0.3   |               | NEA | Gulf of Guinea           |           | CS | 17 |
| <i>Bathymodiolus childressi</i>        | -63.5 to -43.7 | -16.1 to 3.7  |               | WA  | Gulf of Mexico (4 sites) |           | CS | 18 |
| <b>SIBOGLINIDAE</b>                    |                |               |               |     |                          |           |    |    |
| <i>Siboglinum</i> Ib                   | -35.9 to -33-1 | 0.2 to 12.2   | -8.4 to 6.5   | NEA | Gulf of Cadiz            |           | CS | 1  |
| <i>Siboglinum</i> Ia                   | -38.2          | 3.0           | 1.1           | NEA | Gulf of Cadiz            |           | CS | 1  |
| <i>Siboglinum</i> Id                   | -49.8          | 4.2           | 6.0           | NEA | Gulf of Cadiz            |           | CS | 1  |
| <i>Siboglinum</i> If                   | -38.7          | -1.3          | -16.8         | NEA | Gulf of Cadiz            |           | CS | 1  |
| <i>Siboglinum</i> cf. <i>poseidoni</i> | -44.5 to -41.0 | 2.7 to 3.6    | -8.2 to 3.6   | NEA | Gulf of Cadiz            |           | CS | 1  |
| <i>Siboglinum poseidoni</i>            | -78.3 to -73.6 |               |               | NEA |                          |           | RS | 19 |
| Siboglinidae                           | -38.2 to 61.0  | -2.7 to 2.5   |               | NP  | Gulf of Alaska           | 4413-4447 | CS | 3  |
| <i>Lamelisabella denticulata</i>       | -43.7 to -35.2 | -0.6 to 6.6   | -11.8 to -7-7 | NEA | Gulf of Cadiz            |           | CS | 1  |
| <i>Polybrachia</i> sp.1                | -36.9          | -1.1          | 2.5           | NEA | Gulf of Cadiz            |           | CS | 1  |
| <i>Siboglinum atlanticum</i>           | -45.8          |               |               |     |                          |           |    | 13 |
| <i>Siboglinum plumosum</i>             | -43.4 to -39.0 | 4.2 to 7.0    |               | NWP | Sea of Okhotsk           | 382-392   | CS | 2  |
| <i>Lamellibrachia</i> sp.              | -22.9          |               |               |     |                          |           |    | 13 |
| <i>Lamellibrachia</i> sp.              | -35.9 to -28.8 | 2.2 to 4.9    |               | IP  | NZ methane seeps         | 800-1050  | CS | 6  |
| <i>Oligobrachia haakonmosbiensis</i>   | -56.1 to -51.1 |               |               | NEA | Haakon Mosby MV          |           | CS | 20 |
| Sclerolinidae                          | -38.0 to -30.5 | 0.8 to 1.2    |               | NWP | Sea of Okhotsk           | 1522      | CS | 2  |
| <i>Sclerolinum contortum</i>           | -48.3 to -34.9 |               |               | NEA | Haakon Mosby MV          |           | CS | 20 |
| <i>Escarpia southwardae</i>            | -36.2 to -24.2 | 2.5 to 2.9    |               | NEA | Gulf of Guinea           |           | CS | 17 |
| Frenulata und                          | -66.6 to -36.1 | -4.4 to 7.3   |               |     | NZ methane seeps         | 800-1050  | CS | 6  |

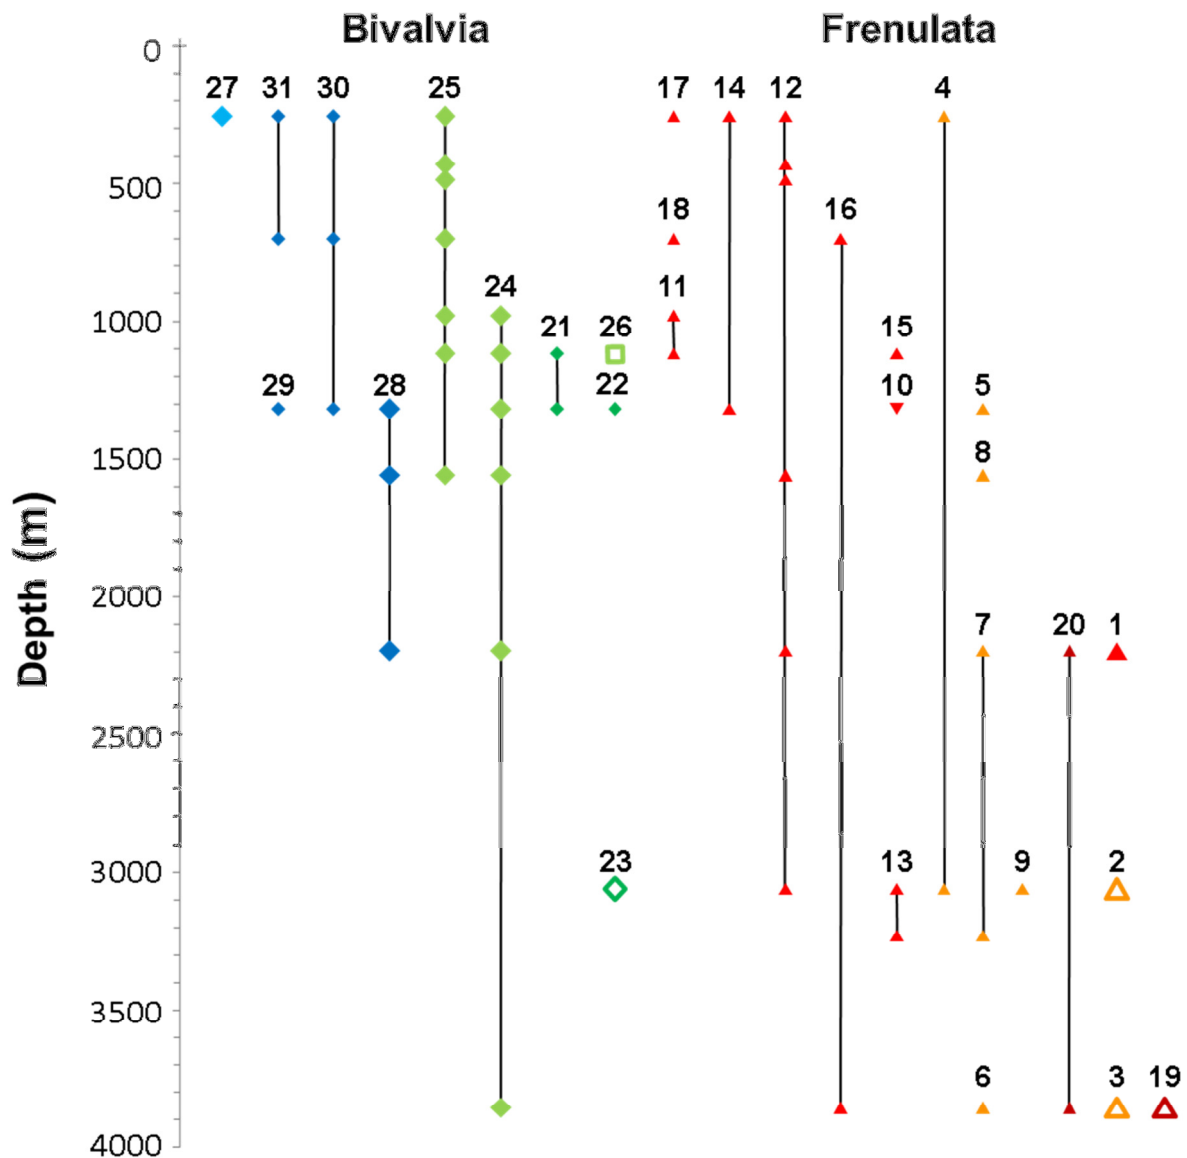

Figure S1. Bathymetric ranges of all chemosymbiotic species known from the Gulf of Cadiz.

Siboglinidae: 1. *Bobmarleya gadensis*; 2. *Lamelisabella* sp.; 3. *Lamelisabella denticulata*; 4. *Polybrachia* sp.1; 5. *Polybrachia* sp.2; 6. *Polybrachia* sp.3; 7. *Polybrachia* Va; 8. *Polybrachia* Vb; 9. *Polybrachia* Vc; 10. *Siboglinum* cf. *poseidoni*; 11. *Siboglinum* Ia; 12. *Siboglinum* Ib; 13. *Siboglinum* Ic; 14. *Siboglinum* Id; 15. *Siboglinum* Ie; 16. *Siboglinum* If; 17. *Siboglinum* sp.1; 18. *Siboglinum* sp.2; 19. *Spirobrachia tripeira*; 20. Undetermined IIa.

Bivalvia: 21. *Isorropodon megadesmus*; 22. *Isorropodon perplexum*; 23. *Christineconcha regab*; 24. *Acharax gadirae*; 25. *Solemya (Petrasma) elarraichensis*; 26. “*Bathymodiolus mauritanicus*”; 27. *Lucinoma asapheus*; 28. *Thyasira vulcolutre*; 29. *Spinaxinus sentosus*; 30. *Axinulus croulinensis* (mixotrophic species); 31. *Thyasira granulosa* (mixotrophic species).

## References

- Carlier, A., Ritt, B., Rodrigues, C. F., Sarrazin, J., Olu, K., Grall, J., and Clavier, J.: Heterogeneous energetic pathways and carbon sources on deep eastern Mediterranean cold seep communities, *Mar. Biol.*, 157, 2545-2565, 2010.
- Cary, C., Fry, B., Felbeck, H., and Vetter, R. D.: Multiple trophic resources for a chemoautotrophic community at a cold water brine seep at the base of the Florida Escarpment, *Mar. Biol.*, 100, 411-418, 1989.
- Cavanaugh, C. M., Wirsen, C. O., and Jannasch, H. W.: Evidence for Methylophilic Symbionts in a Hydrothermal Vent Mussel (*Bivalvia: Mytilidae*) from the Mid-Atlantic Ridge, *Appl. Environ. Microb.*, 58, 3799-3803, 1992.
- Compton, T. J., Kentie, R., Storey, A. W., Veltheim, I., Pearson, G. B., and Piersma, T.: Carbon isotope signatures reveal that diet is related to the relative sizes of the gills and palps in bivalves, *J. Exp. Mar. Biol. Ecol.*, 361, 104-110, 2008.
- Conway, N., Capuzzo, J. M., and Fry, B.: The role of endosymbiotic bacteria in the nutrition of *Solemya velum*: Evidence from stable isotope analysis of endosymbionts and host, *Limnol. Oceanogr.*, 34, 249-255, 1989.
- Dando, P. R., and Southward, A. J.: Chemoautotrophy in bivalve molluscs of the genus *Thyasira*, *J. Mar. Biol. Assoc. UK*, 66, 915-929, 1986.
- Decker, C., and Olu, K.: Does macrofaunal nutrition vary among habitats at the Hakon Mosby mud volcano, *Cah. Biol. Mar.*, 51, 361-367, 2010.
- Duperron, S., Fiala-Medioni, A., Caprais, J. C., Olu, K., and Sibuet, M.: Evidence for chemoautotrophic symbiosis in a Mediterranean cold seep clam (*Bivalvia: Lucinidae*): comparative sequence analysis of bacterial 16S rRNA, APS reductase and RubisCO genes, *FEMS Microbiol. Ecol.*, 59, 64-70, 2007.
- Gebbruk, A. V., Krylova, E. M., Lein, A. Y., Vinogradov, G. M., Anderson, E., Pimenov, N. V., Cherkashev, G. A., and Crane, K.: Methane seep community of the Hakon Mosby mud volcano (the Norwegian Sea): composition and trophic aspects, *Sarsia*, 88, 394-403, 2003.
- Hensen, C., Nuzzo, M., Hornibrook, E., Pinheiro, L. M., Bock, B., Magalhaes, V. H., and Bruckmann, W.: Sources of mud volcano fluids in the Gulf of Cadiz - indicators for hydrothermal imprint, *Geochimica et Cosmochimica Acta*, 71, 1232-1248, 2007.

- Levin, L. A., and Michener, R. H.: Isotopic evidence for chemosynthesis-based nutrition of macrobenthos: The lightness of being at Pacific methane seeps, *Limnol.Oceanog.*, 47, 1336-1345, 2002.
- MacAvoy, S. E., Carney, R. S., Morgan, E., and Macko, S. A.: Stable isotope variation among the mussel *Bathymodiolus childressi* and associated heterotrophic fauna at four cold-seep communities in the Gulf of Mexico, *J. Shellfish Res.*, 27, 147-151, 2008.
- Niemann, H., Duarte, J., Hensen, C., Omoregie, E., Magalhães, V. H., Elvert, M., L.M., P., Kopf, A., and Boetius, A.: Microbial methane turnover at mud volcanoes of the Gulf of Cadiz, *Geochimica et Cosmochimica Acta*, 70, 5336-5355, 2006.
- Nuzzo, M., Hornibrook, E. R. C., Gill, F., Hensen, C., Pancost, R. D., Haeckel, M., Reitz, A., Scholz, F., Magalhaes, V. H., Bruckmann, W., and Pinheiro, L. M.: Origin of light volatile hydrocarbon gases in mud volcano fluids, Gulf of Cadiz - evidence for multiple sources and transport mechanisms in active sedimentary wedges, *Chemical Geology*, 266, 350-363, 2009.
- Olu-Le Roy, K., Sibuet, M., Fiala-Médioni, A., Gofas, S., Salas, C., Mariotti, A., Foucher, J. P., and Woodside, J.: Cold seep communities in the deep eastern Mediterranean Sea: composition, symbiosis and spatial distribution on mud volcanoes, *Deep-Sea Res. PT I*, 51, 1915 - 1936, 2004.
- Olu, K., Caprais, J. C., Galeron, J., Causse, R., von Cosel, R., Budzinski, H., Le Ménach, K., Le Roux, C., Levaché, D., Khripounoff, A., and Sibuet, M.: Influence of seep emission on the non-symbiont bearing fauna and vagrant species at an active giant pockmark in the Gulf of Guinea (Congo-Angola margin), *Deep-Sea Res. PT II*, 56, 2380-2393, 2009.
- Sahling, H., Galkin, S. V., Salyuk, A., Greinert, J., Foerstel, H., Piepenburg, D., and Suess E.: Depth-related structure and ecological significance of cold-seep communities - a case study from the Sea of Okhotsk, *Deep-Sea Res. PT I*, 50, 1391-1409, 2003.
- Schmaljohann, R., Faber, E., Whiticar, M. J., and Dando, P. R.: Co-existence of methane- and sulphur-based endosymbioses between bacteria and invertebrates at a site in the Skagerrak, *Mar. Ecol-Prog. Ser.*, 61, 119-124, 1990.
- Sellanes, J., Quiroga, E., and Neira, C.: Megafauna community structure and trophic relationships at the recently discovered Concepción methane Seep Area, Chile, ~36°C, *International Council for the Exploration of the Sea*, 1102-1111, 2008.

Spiro, B., Greenwood, P. B., Southward, A. J., and Dando, P. R.:  $^{13}\text{C}/^{12}\text{C}$  ratios in marine invertebrates from reducing sediments: confirmation of nutritional importance of chemoautotrophic endosymbiotic bacteria, *Mar. Ecol-Prog. Ser.*, 28, 233-240, 1986.

Stadnitskaia, A., Ivanov, M. K., Blinova, V., Kreulen, R., and van Weering, T. C. E.: Molecular and carbon isotopic variability of hydrocarbon gases from mud volcanoes in the Gulf of Cadiz, NE Atlantic, *Marine and Petroleum Geology*, 23, 281-296, 2006.

Thurber, A. R., Kroger, K., Neira, C., Wiklund, H., and Levin, L.: Stable isotope signatures and methane use by New Zealand cold seep benthos, *Mar Geol*, 272, 260-269, 2010.

Vanneste, H., Kelly-Gerreyn, B. A., Connelly, D. P., James, R. H., Haeckel, M., Fisher, R. E., Heeschen, K., and Mills, R. A.: Spatial variation in fluid flow and geochemical fluxes across the sediment-seawater at the Carlos Ribeiro mud volcano (Gulf of Cadiz), *Geochimica et Cosmochimica Acta*, 75, 1124-1144, 2011.

Vetter, R. D., and Fry, B.: Sulfur contents and sulfur-isotope compositions of thiotrophic symbioses in bivalve molluscs and vestimentiferan worms, *Mar. Biol.*, 132, 453-460, 1998.
